# Supplementary material for: Performance enhancement of asymmetric supercapacitors with bud-like Cu-doped Mn3O4 hollow and porous structures on nickel foam as positive electrodes
Source: Royal Society of Chemistry journal article supplement (doi:10.1039/c8ra06989a), 2018-01-01
Supplement: c8ra06989a1.pdf [file c8ra06989a1.pdf]

## Supporting Information

### **Performance enhancement of asymmetric supercapacitor with bud-like Cu-doped Mn<sub>3</sub>O<sub>4</sub> hollow and porous structures on nickel foam as positive electrode**

Xiaobo Chen,<sup>a</sup> Cheng Chen,<sup>a</sup> Tianzhi Xu,<sup>a</sup> Yingjie Xu,<sup>a</sup> Weiwei Liu,<sup>a</sup> Wen Yang,<sup>b</sup> Peizhi Yang<sup>\*b</sup>

<sup>a</sup>School of New Energy and Electronic Engineering, Yancheng Teachers University, Yancheng, 224051, PR China

<sup>b</sup>Key Laboratory of Education Ministry for Advance Technique and Preparation of Renewable Energy Materials, Yunnan Normal University, Kunming, 650500, PR China

E-mail addresses: pzhyang@hotmail.com (P. Yang)

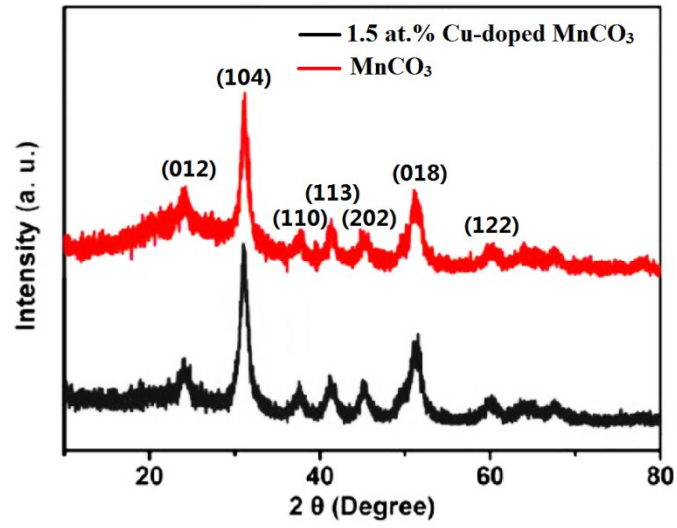

**Fig.S1.** XRD patterns of the samples MnCO<sub>3</sub> and 1.5 at.% Cu-doped MnCO<sub>3</sub>.

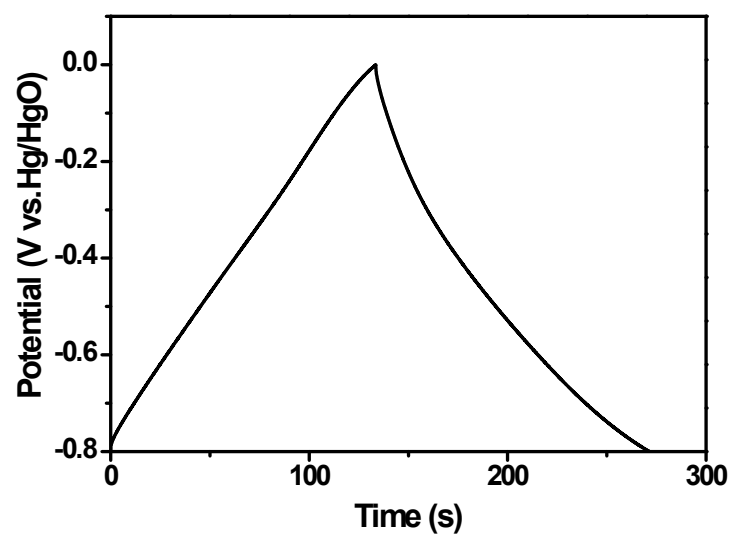

**Fig.S2.** Galvanostatic charge–discharge curve of the G electrode at a current density of  $1 \text{ A g}^{-1}$ .
